# Supplementary material for: Knowledge, Attitude, and Practices toward Skin Cancer Prevention and Detection among Students of Rawalpindi Medical University: A Cross- Sectional Study
Source: Research Square preprint supplement (doi:10.21203/rs.3.rs-6949812/v1), 2025-06-24
Supplement: Supplementary file 1 [file 0cca7bb1628564d442a01de3.docx]

**Table 2: General Knowledge Regarding Skin Cancer**

| ***Do you know about skin cancer?*** | | |
| --- | --- | --- |
|  | **Frequency** | **Percent** |
| No | 95 | 36.5 |
| Yes | 165 | 63.5 |
| Total | 260 | 100.0 |
| ***What is your major source of information about skin cancer?*** | | |
|  | Frequency | Percent |
| Books | 29 | 11.2 |
| Course outside medical school | 7 | 2.7 |
| Friend/relative | 6 | 2.3 |
| Health professional | 10 | 3.8 |
| Internet | 87 | 33.5 |
| Media | 22 | 8.5 |
| Medical school | 99 | 38.1 |
| ***According to your knowledge, what is the most common form of skin cancer?*** | | |
| Angiosarcoma | 3 | 1.2 |
| Basal cell carcinoma | 56 | 21.5 |
| Don’t know | 80 | 30.8 |
| Melanoma | 84 | 32.3 |
| Squamous cell carcinoma | 31 | 11.9 |
| T Cell lymphoma | 6 | 2.3 |
| ***How many moles (melanocytic nevi) does the average person have?*** | | |
| 10 | 52 | 20.0 |
| 100 | 4 | 1.5 |
| 25 | 32 | 12.3 |
| 5 | 35 | 13.5 |
| 50 | 15 | 5.8 |
| Don't Know | 122 | 46.9 |
| ***What are the melanoma characteristics?*** | | |
| Change of color/several colors | 60 | 23.1 |
| Don’t know | 67 | 25.8 |
| Mole with asymmetric borders | 60 | 23.1 |
| Pigmented lesion | 60 | 23.1 |
| Wound that does not heal | 13 | 5.0 |
| Change of color/several colors | 60 | 23.1 |
