# Supplementary material for: Knowledge, Attitude, and Practices toward Skin Cancer Prevention and Detection among Students of Rawalpindi Medical University: A Cross- Sectional Study
Source: Research Square preprint supplement (doi:10.21203/rs.3.rs-6949812/v1), 2025-06-24
Supplement: Supplementary file 2 [file 321eaf70d53f55ba1c9d483f.docx]

**Table 1: Demographics**

| ***Age in years*** | Frequency | Percent |
| --- | --- | --- |
| 20–23  24–27  Less than 20 | 140 | 53.8 |
| 16 | 6.2 |
| 104 | 40.0 |
| ***Study Year*** | | |
| First year | 151 | 58.1 |
| Second year | 31 | 11.9 |
| Third year | 16 | 6.2 |
| Fourth year | 23 | 8.8 |
| Final year | 39 | 15.0 |
| ***Average academic rank*** | | |
| Excellent | 11 | 4.2 |
| Very good | 62 | 23.8 |
| Good | 175 | 67.3 |
| Weak | 12 | 4.6 |
| ***Do you have a family history of skin cancer?*** | | |
| No | 252 | 96.9 |
| Yes | 8 | 3.1 |
