# Supplementary material for: Knowledge, Attitude, and Practices toward Skin Cancer Prevention and Detection among Students of Rawalpindi Medical University: A Cross- Sectional Study
Source: Research Square preprint supplement (doi:10.21203/rs.3.rs-6949812/v1), 2025-06-24
Supplement: Supplementary file 3 [file 5bf5b357cd9ed07768c3d997.docx]

**Table 4: Attitudes towards skin self-examination**

| **Variable** | **Response** | **N** |
| --- | --- | --- |
| **Do you have the habit of doing skin self-examination?** | No | 142 |
|  | Yes | 118 |
| **If not, why?** | I have learned about it but am scared of finding something | 7 |
|  | It is not necessary | 12 |
|  | Never thought about it | 123 |
| **What do you look for in skin self-examination?** | Changing mole | 32 |
|  | New lesion | 44 |
|  | New mole | 32 |
|  | Nodule | 10 |
| **Reasons for performing skin self-examination** | Early detection of skin cancer | 33 |
|  | Fear of skin cancer | 9 |
|  | Friend/relative had skin cancer | 4 |
|  | Peace of mind | 66 |
|  | Recommendation from doctor | 6 |
| **Where did you learn about skin self-examination?** | Books | 13 |
|  | Dermatologist/healthcare professional | 15 |
|  | Friends/relatives | 11 |
|  | Internet | 25 |
|  | Medical courses and lectures | 23 |
|  | Social media | 21 |
| **Mean general knowledge about risk factors for skin cancer** | **Yes (habit of self-examination)** | 10.81 |
|  | **No (no habit of self-examination)** | 9.13 |
| **P-value** |  | **0.01** |
