# Supplementary material for: Knowledge, Attitude, and Practices toward Skin Cancer Prevention and Detection among Students of Rawalpindi Medical University: A Cross- Sectional Study
Source: Research Square preprint supplement (doi:10.21203/rs.3.rs-6949812/v1), 2025-06-24
Supplement: Supplementary file 4 [file 61cf31620986622b6e195f56.docx]

|  | **Mean** | **P-value** |
| --- | --- | --- |
| First year | 12.564103 | <0.001 |
| Second year | 9.039735 | <0.001 |
| Third year | 12.652174 | <0.001 |
| Fourth year | 9.806452 | <0.001 |
| Final year | 7.562500 | <0.001 |

**Table 3: General Knowledge about Risk Factors for Skin Cancer**
