# Supplementary material for: Knowledge, Attitude, and Practices toward Skin Cancer Prevention and Detection among Students of Rawalpindi Medical University: A Cross- Sectional Study
Source: Research Square preprint supplement (doi:10.21203/rs.3.rs-6949812/v1), 2025-06-24
Supplement: Supplementary file 5 [file 926f816d7e1fe2b76d338702.docx]

**Table 5: Practices of students towards sun exposures**

|  | **Never** | **Rarely** | **Sometimes** | **Often** | **Always** |
| --- | --- | --- | --- | --- | --- |
| I avoid the sun during the hours of 10 am to 4 pm | 35 | 66 | 80 | 64 | 15 |
| When I go out, I wear a hat | 91 | 61 | 54 | 36 | 18 |
| I wear sunglasses | 114 | 61 | 44 | 32 | 9 |
| When I go out, I use sunscreen at least with an SPF  of 15 | 60 | 34 | 47 | 60 | 59 |
| I do not go to swim | 74 | 32 | 32 | 26 | 96 |
| I drink water minimum 8-10 glasses of water | 14 | 42 | 59 | 99 | 46 |
| I wear long pants and long-sleeved shirt/  kameez and shalwar at summertime. | 9 | 17 | 34 | 65 | 135 |
